# Supplementary material for: A Thermochromic Superhydrophobic Surface
Source: PubMed Central journal article supplement (PMC4908389; doi:10.1038/srep27984), 2016-06-15
Supplement: srep27984-s1.pdf [file srep27984-s1.pdf]

## Supplementary Information

### A Thermochromic Superhydrophobic Surface

Pietro Cataldi,<sup>a</sup> Ilker S. Bayer,<sup>a\*</sup> Roberto Cingolani,<sup>b\*</sup> Sergio Marras,<sup>c</sup> Ryad Chellali<sup>d</sup>,  
Athanassia Athanassiou<sup>a</sup>

<sup>a</sup>Smart Materials, Istituto Italiano di Tecnologia, Via Morego 30, 16163 Genova, Italy

<sup>b</sup>Central Laboratories, Istituto Italiano di Tecnologia, Via Morego 30, 16163 Genova, Italy

<sup>c</sup>Nanochemistry, Istituto Italiano di Tecnologia, Via Morego 30, 16163 Genova, Italy

<sup>d</sup>Pattern Analysis and Computer Vision (PAVIS), Istituto Italiano di Tecnologia, Via Morego 30, 16163 Genova, Italy

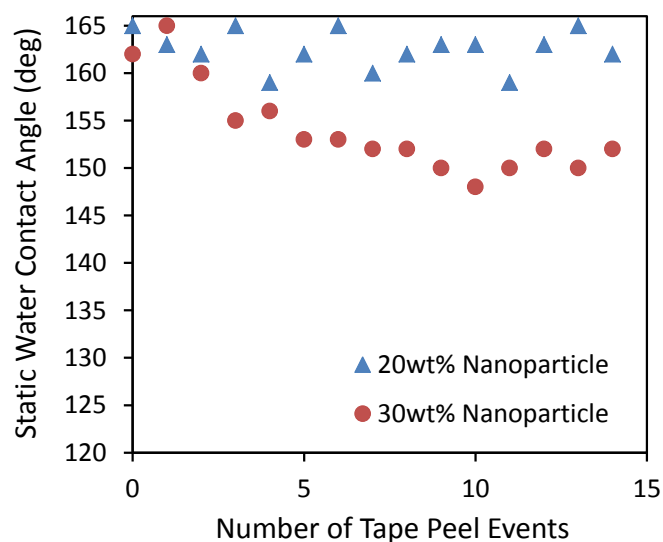

**Figure S1.** Changes in the static water contact angle as a function of tape peel events by using a 3M tape with 820 N/m adhesion strength on steel. Two different superhydrophobic surfaces were tested containing 20wt% and 30wt% SiO<sub>2</sub> nanoparticles. None of the coatings could be completely removed at the end of 15 peel events indicating that the coating adhesion to aluminum is larger than 820N/m. However, the coating with 30wt% SiO<sub>2</sub> nanoparticles demonstrated lower water contact angles close to the generally accepted superhydrophobicity threshold (150°).

**Video File:** Water droplet impact on a thermochromic superhydrophobic surface. Room temperature drop bounces on the heated superhydrophobic surface. The zone where the droplet impacts changes color due to temperature difference between the droplet and the surface.
